# Supplementary material for: Regulation of L-ascorbic acid content in strawberry fruits
Source: PubMed Central journal article supplement — J Exp Bot. 2011 May 11;62(12):4191–201. doi: 10.1093/jxb/err122 (PMC3153677; doi:10.1093/jxb/err122), 2011-05-11
Supplement: supp_err122_00060160-file001.pdf [file supp_err122_00060160-file001.pdf]

## The synthesis of L-ascorbic acid in the fruits of different *Fragaria* species

Eduardo Cruz-Rus, Iraida Amaya, José F. Sánchez-Sevilla, Miguel A. Botella and Victoriano Valpuesta

**Table S1.** Sequence of the specific primers used for RT-PCR expression studies.

| Gene            | Primer  | Sequence                    |
|-----------------|---------|-----------------------------|
| <i>FaGME</i>    | Forward | TTGCAACTGAGGAGTTGTGC        |
|                 | Reverse | TCGGGTCTGAAGTCCATCTC        |
| <i>FaGIPP</i>   | Forward | TGGTGTAACGGAGCTGACTG        |
|                 | Reverse | CAGAAATGCACCTCCTCCAC        |
| <i>FaGalUR</i>  | Forward | CTGTAATCGGCATGGGA ACT       |
|                 | Reverse | TGATGAGTTGGAGACGGAGA        |
| <i>FaGLDH</i>   | Forward | CACATGGTACTGGTGCAAGG        |
|                 | Reverse | AGGCCACAGCGAGCTAAATA        |
| <i>FaMYOX</i>   | Forward | CCCCAAATTGAGCACTTGTT        |
|                 | Reverse | GGCCTCAAAGCTAGGAAGT         |
| <i>FaMDHAR</i>  | Forward | TTGGCAATAGCCTGGTTTTC        |
|                 | Reverse | CGTGCTCTTTGGAGACAACA        |
| <i>FaDHAR</i>   | Forward | GGTTTAGCCACCCAGTTTGA        |
|                 | Reverse | GGAATCTTTTGCCAAGACCA        |
| <i>FaRIB413</i> | Forward | ACCGTTGATTCGCACAATTGGTCATCG |
|                 | Reverse | TACTGCGGGTCGGCAATCGGACG     |

**Table S2.** Table with the different restriction sites and the fragments length of the different cuts in the different alleles.

|          | <i>Eco52I</i> | Fragment Length (bp) | <i>MbiI</i> | Fragment Length (bp) |
|----------|---------------|----------------------|-------------|----------------------|
| Allele 1 | +             | 554 + 406            | +           | 651 + 309            |
| Allele 2 | +             | 554 + 406            | +           | 651 + 309            |
| Allele 3 | -             | 960                  | -           | 960                  |

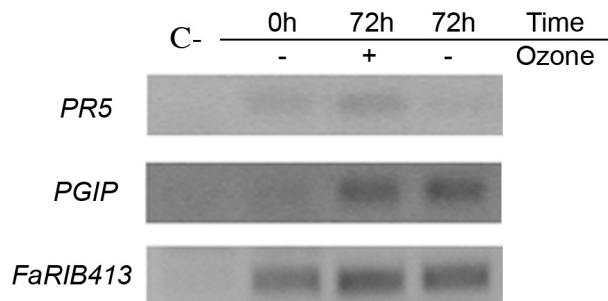

**Figure S1.** Changes in mRNA levels of *PR5* and *PGIP*, two pathogen-induced genes (Osorio *et al.*, 2008) in fruits before (0 h) and after storage for 72 h in ozone or air atmosphere by semi-quantitative RT-PCR.

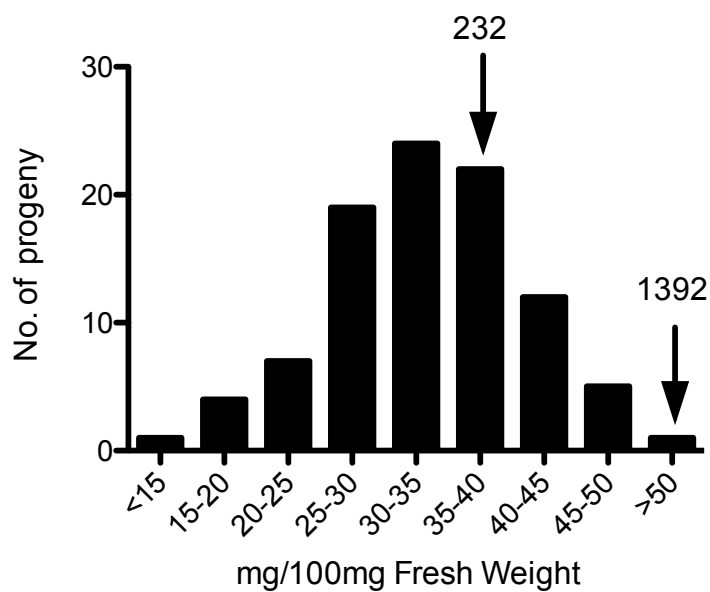

**Figure S2.** Frequency distributions of AsA for the 95 individuals from the population segregation derived from the cross between '232' and '1392'. Arrows indicate the parental values.



|          |                                                              |      |
|----------|--------------------------------------------------------------|------|
| Allele_1 | GGCTTACTCTCCGCTCGGAGCAGCTAGGACTAAATGGGGTGACGATAGGGTTTTGGGATC | 953  |
| Allele_2 | GGCTTACTCTCCGCTCGGAGCAGCTAGGACTAAATGGGGTGACGATAGGGTTTTGGGATC | 956  |
| Allele_3 | GGCTTACTCTCCGCTTGGAGCAGCTAGGACTAAATGGGGTGACGATAGGGTTTTGGGATC | 951  |
|          |                                                              |      |
| Allele_1 | AGATATCATCGAAGAGATTGCCCAAGCCAAAGGAAAATCAACTGCTCAGGTATGTCCGTA | 1013 |
| Allele_2 | AGATATCATCGAAGAGATTGCCCAAGCCAAAGGAAAATCAACTGCTCAGGTATGTCCGTA | 1016 |
| Allele_3 | AGATATCATCGAAGAGATTGCCCAAGCCAAAGGAAAATCAACTGCTCAGGTATGTCCGTA | 1011 |
| Allele_1 | CAAAATCTACTAGAGTTTGGGAAATGCGATTTGAAGGATTGAGGTATCTAAATTTGAAAC | 1073 |
| Allele_2 | CAAAATCTACTAGAGTTTGGGAAATGCGATTTGAAGGATTGAGGTATCTAAATTTGAAAC | 1076 |
| Allele_3 | CAAAATCTACTAGAGTTTGGGAAATGCGATTTGAAGGATTGAGGTATCTAAATTTGAAAC | 1071 |
| Allele_1 | TAGTGTGATCAGTTAATGGTTGACATGGTTGCAGATATCATTGAGATGGGTGTACGAAC  | 1133 |
| Allele_2 | TAGTGTGATCAGTTAATGGTTGACATGGTTGCAGATATCATTGAGATGGGTGTACGAAC  | 1136 |
| Allele_3 | TAGTGTGATCAGTTAATGGTTGACATGGTTGCAGATATCATTGAGATGGGTGTACGAAC  | 1131 |
| Allele_1 | AAGGTGTGAGCATAGTAACAAAAAGTTACAACAAAGAAAGAATGAGGCAGAACCTTGACA | 1193 |
| Allele_2 | AAGGTGTGAGCATAGTAACAAAAAGTTACAACAAAGAAAGAATGAGGCAGAACCTTGACA | 1196 |
| Allele_3 | AAGGTGTGAGCATAGTAACAAAAAGTTACAACAAAGAAAGAATGAGGCAGAACCTTGACA | 1191 |
| Allele_1 | TCTTCGACTTCTGCTTGACCGAGGAGGAAGTGGAGAAGATGAGTCATCTTCCACAGCGGA | 1253 |
| Allele_2 | TCTTCGACTTCTGCTTGACCGAGGAGGAAGTGGAGAAGATGAGTCATCTTCCACAGCGGA | 1256 |
| Allele_3 | TCTTCGACTTCTGCTTGACCGAGGAGGAAGTGGAGAAGATGAGTCATCTTCCACAGCGGA | 1251 |
| Allele_1 | AAGGGGTTACCTTTGCTTCAATTCTAGGACCCCATGATATTGTTCTGGAAGTTGACGAAG | 1313 |
| Allele_2 | AAGGGGTTACCTTTGCTTCAATTCTAGGACCCCATGATATTGTTCTGGAAGTTGACGAAG | 1316 |
| Allele_3 | AAGGGGTTACCTTTGCTTCAATTCTTGGACCCCATGATATTGTTCTGGAAGTTGACGAAG | 1311 |
| Allele_1 | AATTA                                                        | 1318 |
| Allele_2 | AATTA                                                        | 1321 |
| Allele_3 | AATTA                                                        | 1316 |

**Figure S3.** Alignment of the three different alleles of *FaGalUR*. Exons are indicated with Black backgrounds and introns with grey backgrounds. Gaps are indicated by dashes and letters with background are identical nucleotides. The different between Allele 1 and 2 is only the length of the SSR, although the different between alleles 1 and 2 with allele 3 is the SSR length and the changes in four nucleotides that produce changes in two aminoacids and different restriction sites. The restriction sites used are indicated with brackets.

**Osorio S, Castillejo C, Quesada MA, Medina-Escobar N, Brownsey GJ, Suau R, Heredia A, Botella MA, Valpuesta V.** 2008. Partial demethylation of oligogalacturonides by pectin methyl esterase 1 is required for eliciting defence responses in wild strawberry (*Fragaria vesca*). *Plant J* **54**, 43-55.
